# Supplementary material for: Novel Derivatives of Nitrobenzofurazan with Chromogenic and Fluorogenic Properties
Source: MDPI journal article supplement (doi:10.3390/molecules28166146), 2023-08-20

## Supplementary Material

### Novel derivatives of nitrobenzofurazan with chromogenic and fluorogenic properties

Alexandru Bujor, Anamaria Hanganu, Rodica Baratoiu, Elena N. Hristea, Madalina Tudose, Victorita Tecuceanu, Augustin M. Madalan and Petre Ionita

#### List of Figures and Tables

**Figure S1.** Fluorescence (A) and IR (B) spectrum of compound **1**

**Figure S2.** ESR (A) and MS (B) spectrum of compound **2**

**Figure S3.**  $^{13}\text{C}$ -NMR spectrum of compound **3**

**Figure S4.** Fluorescence (A) and MS (B) spectrum of compound **4**

**Figure S5.** Fluorescence (A) and MS (B) spectrum of compound **5**

**Figure S6.** Fluorescence (A) and MS (B) spectrum of compound **6**

**Figure S7.** Fluorescence (A) and MS (B) spectrum of compound **7**

**Table S1.**  $R_f$  values obtained by RP-TLC

**Figure S8.** Colour of an acetone solution of compounds **1-7** (up) and their fluorescence at 365 nm (bottom).

**Figure S9.** Semi-empirical PM3 geometry optimization of compounds **1-7**.

**Figure S1.** Fluorescence (A) and IR (B) spectrum of compound **1**

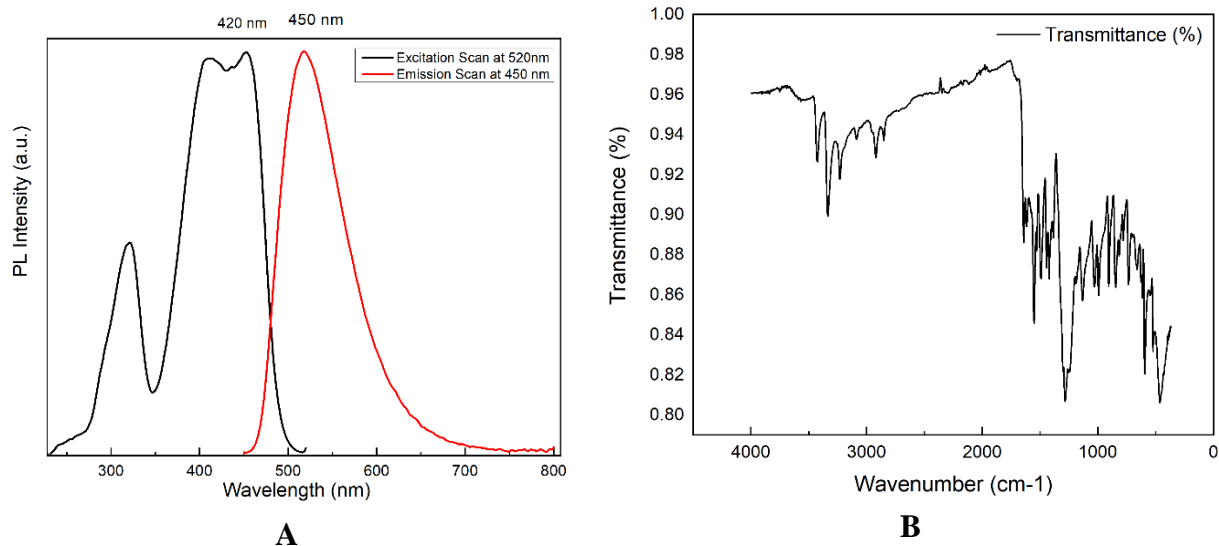

**Figure S2.** ESR (A) and MS (B) spectrum of compound **2**

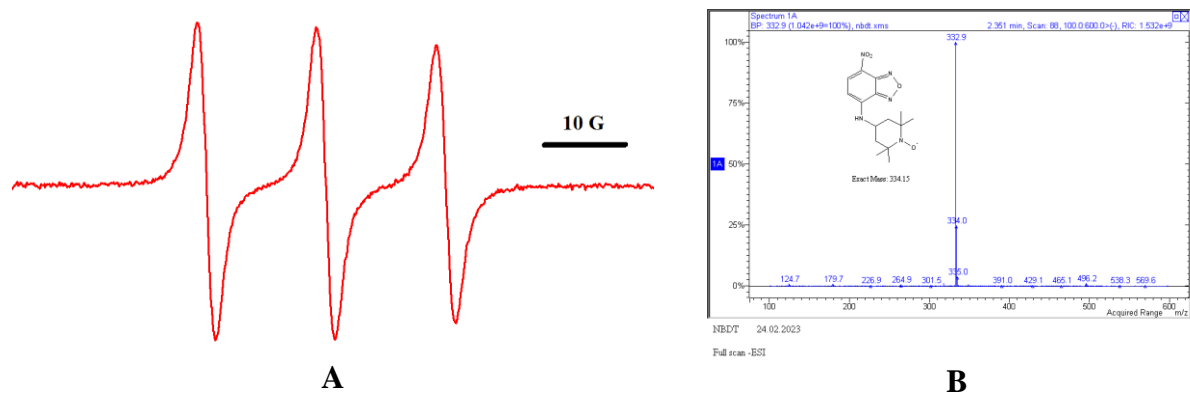

**Figure S3.**  $^{13}\text{C}$ -NMR spectrum of compound **3**

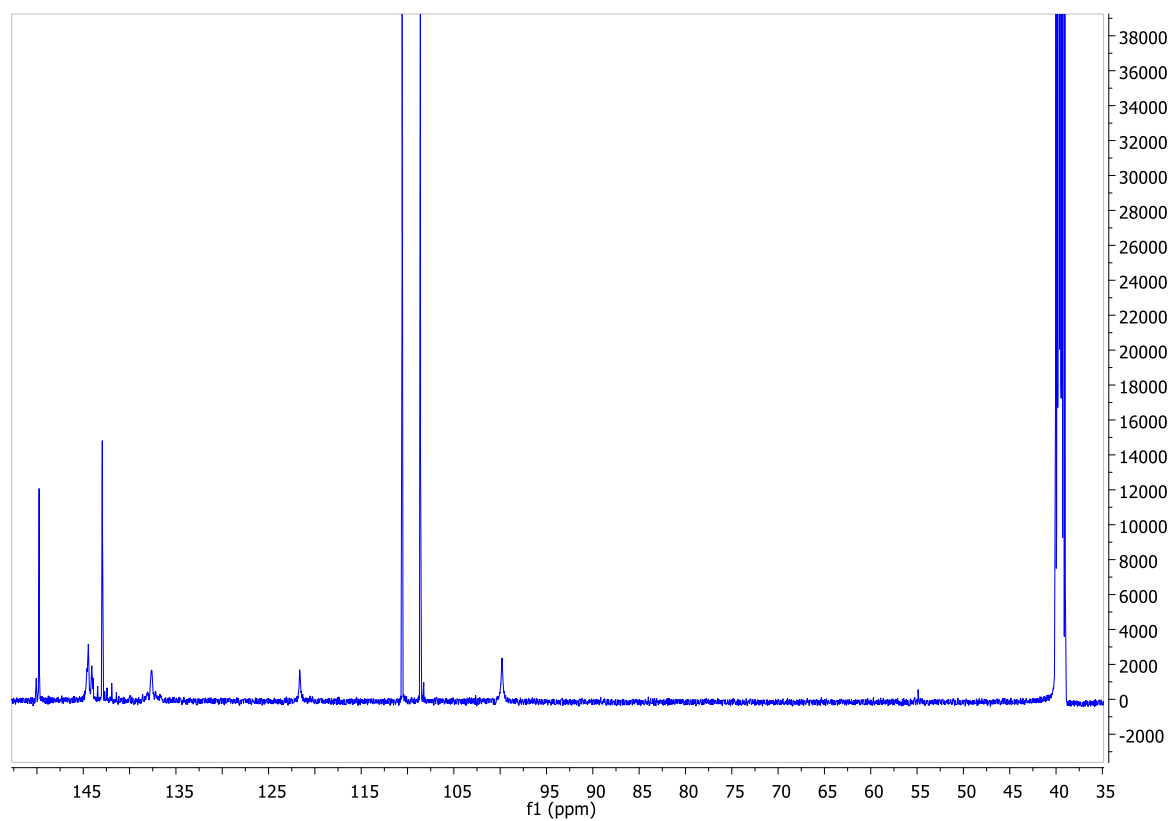

**Figure S4.** Fluorescence (A) and MS (B) spectrum of compound **4**

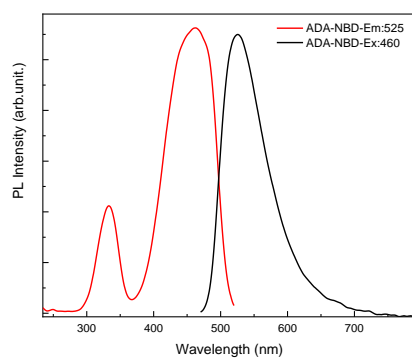

**A**

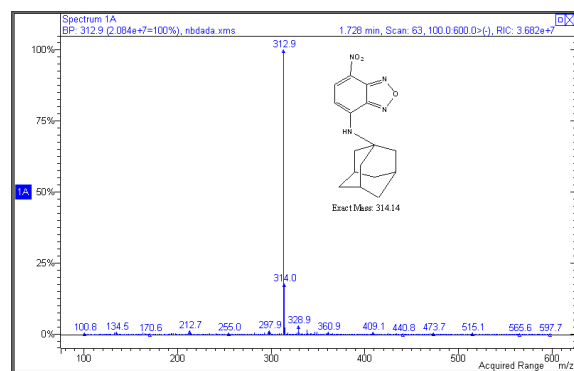

**B**

**Figure S5.** Fluorescence (A) and MS (B) spectrum of compound **5**

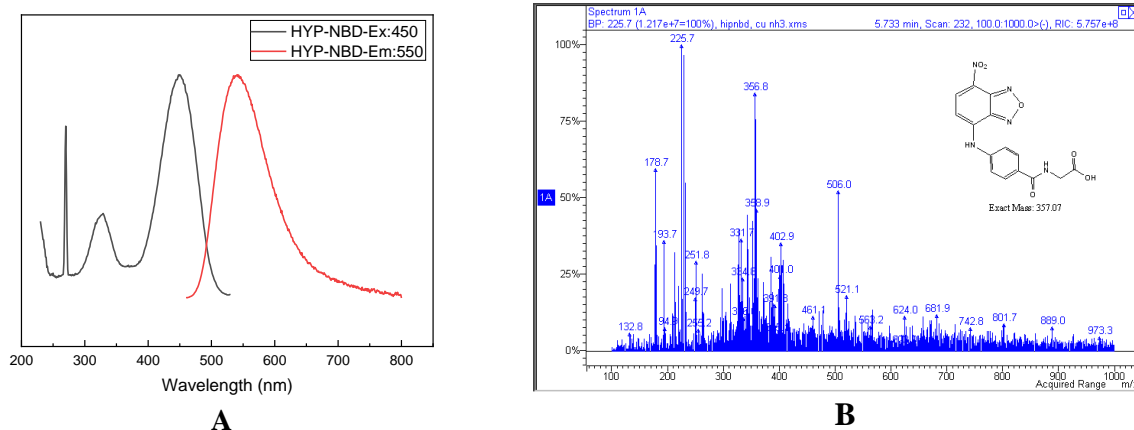

**Figure S6.** Fluorescence (A) and MS (B) spectrum of compound **6**

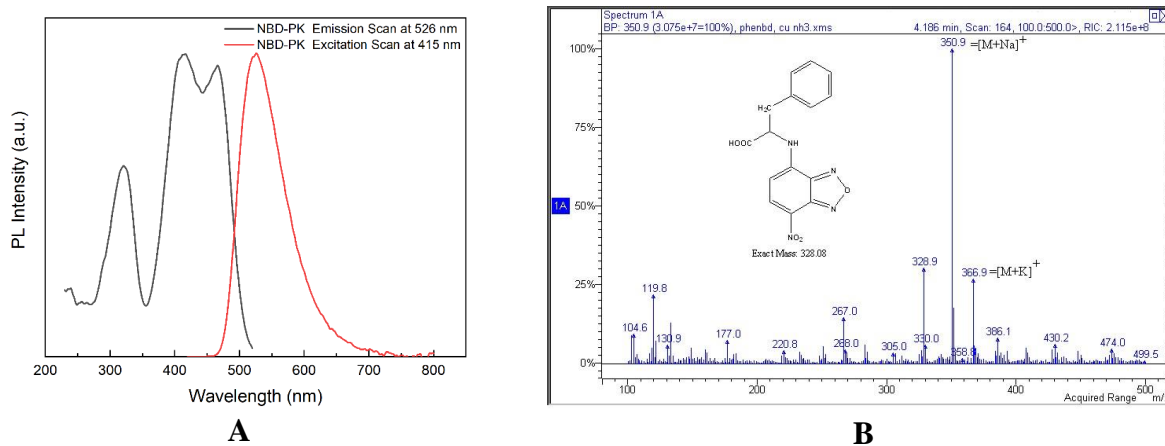

**Figure S7.** Fluorescence (A) and MS (B) spectrum of compound **7**

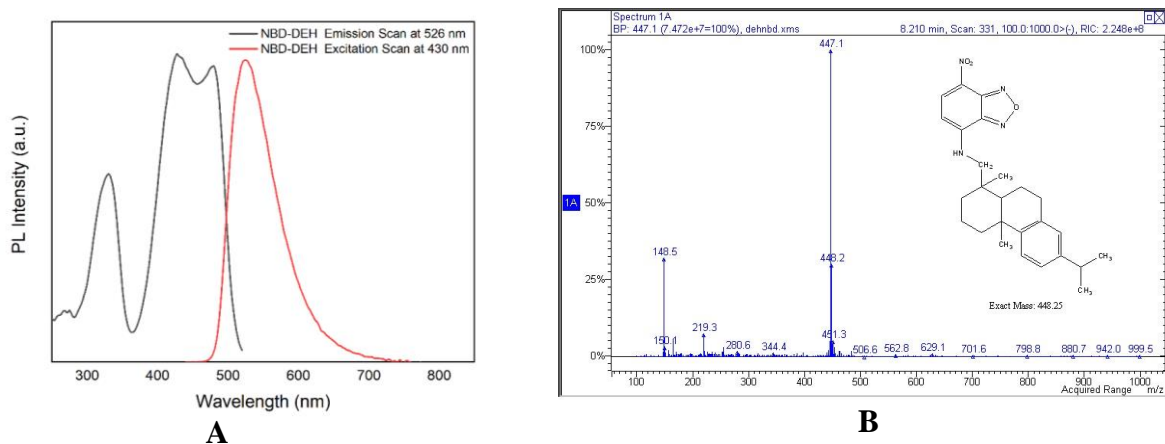

**Table S1.**  $R_f$  values obtained by RP-TLC

| C/Cmp. | 1    | 2    | 3    | 4    | 5 | 6    | 7    |
|--------|------|------|------|------|---|------|------|
| 0.5    | 0.62 | 0.12 | 0.25 | 0.06 | - | 0.17 | 0.02 |
| 0.6    | 0.63 | 0.33 | 0.58 | 0.08 | - | 0.21 | 0.04 |
| 0.7    | 0.73 | 0.46 | 0.72 | 0.19 | - | 0.42 | 0.08 |
| 0.8    | 0.79 | 0.65 | 0.76 | 0.47 | - | 0.59 | 0.26 |

**Figure S8.** Colour of an acetone solution of compounds **1-7** (up) and their fluorescence at 365 nm (bottom).

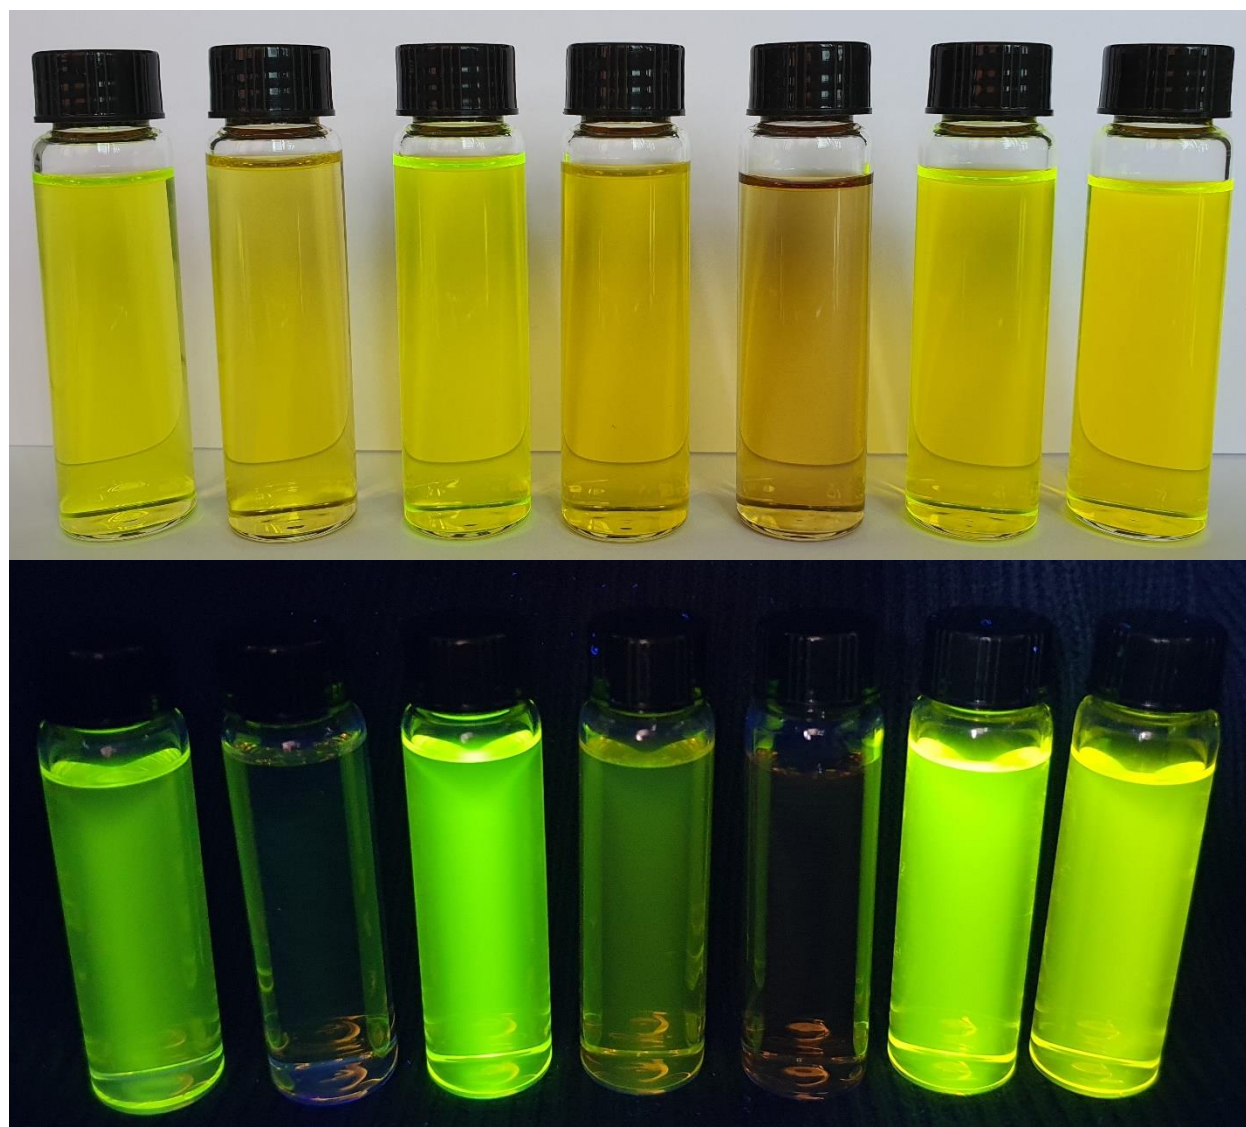

**Figure S9.** Semi-empirical PM3 geometry optimization of compounds **1-7**.

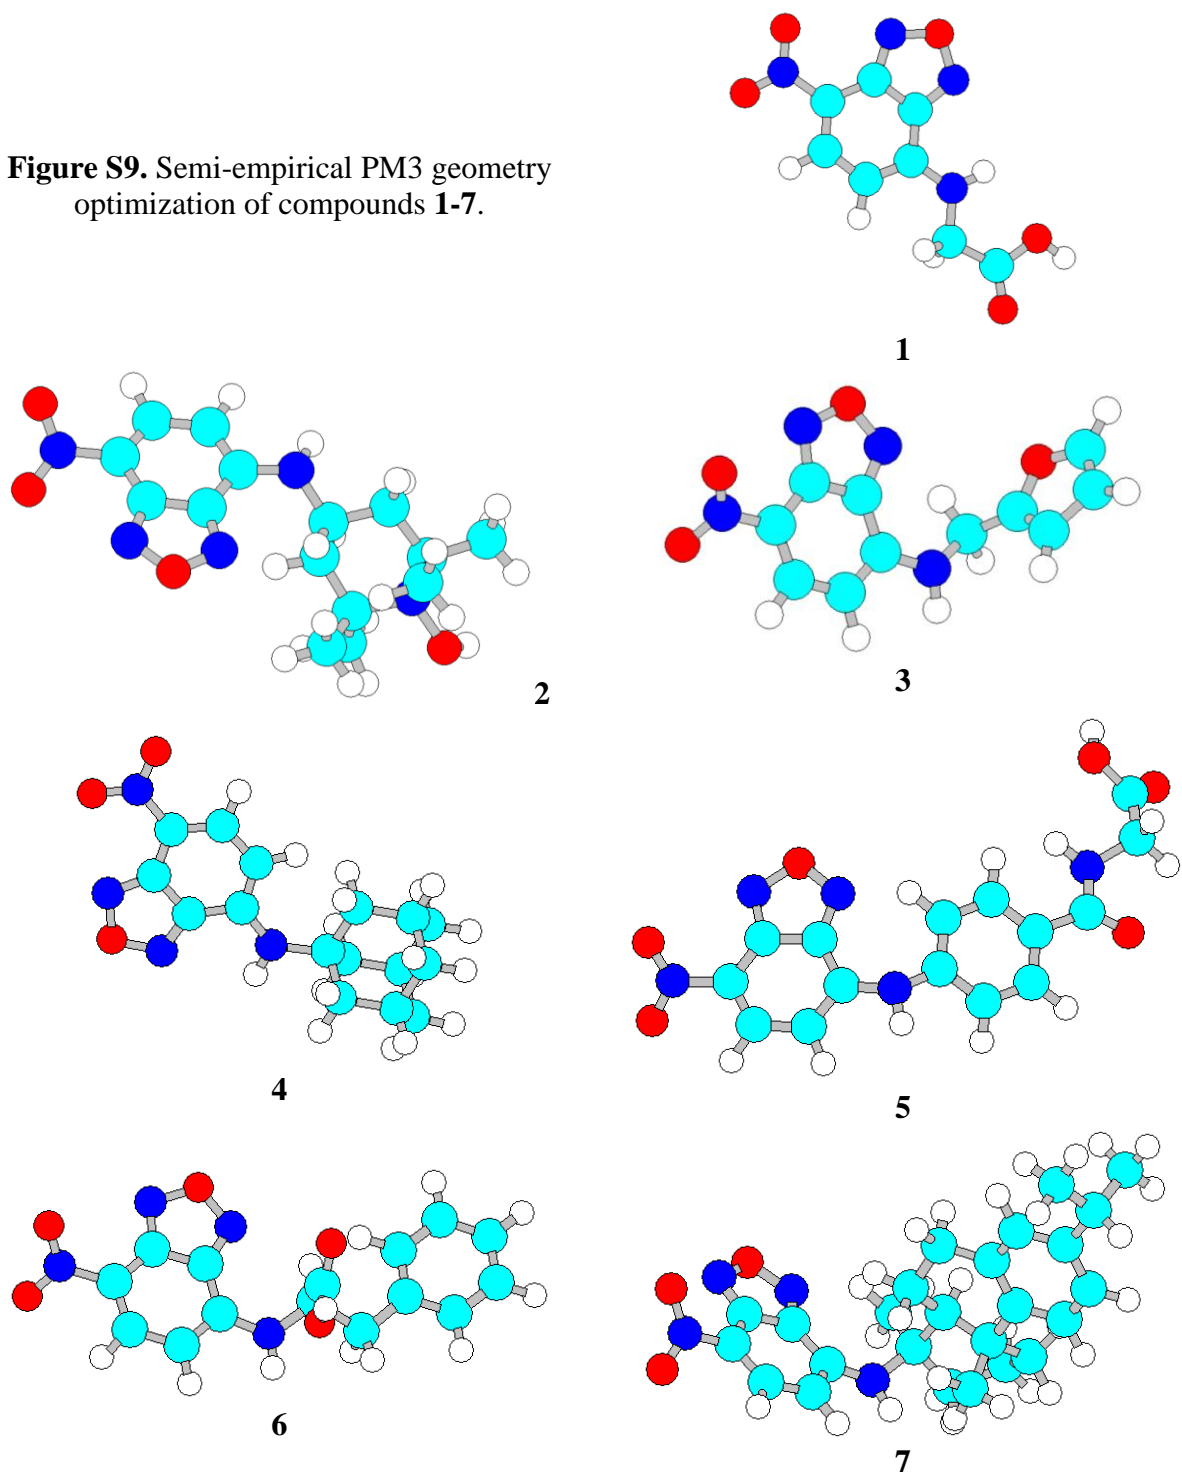

Supplement: s1 [file s1]
